# Supplementary material for: Acceleration of plague outbreaks in the second pandemic
Source: PubMed Central journal article supplement — Proc Natl Acad Sci U S A. 2020 Oct 19;117(44):27703–11. doi: 10.1073/pnas.2004904117 (PMC7959508; doi:10.1073/pnas.2004904117), 2020-10-19
Supplement: pnas.2004904117.sapp.pdf [file pnas.2004904117.sapp.pdf]

## Supplementary Information for

### Acceleration of plague outbreaks in the second pandemic

David J. D. Earn, Junling Ma, Hendrik Poinar, Jonathan Dushoff, Benjamin M. Bolker

E-mail: [earn@math.mcmaster.ca](mailto:earn@math.mcmaster.ca)

DOI: 10.1073/pnas.2004904

#### This PDF file includes:

[Supplementary text](#)  
[Figs. S1 to S8](#)  
[Tables S1 to S7](#)  
[SI References](#)

## 12 Supporting Information Text

### 13 Historical human population estimates for London

14 See [Table S1](#) and [Figure S1](#).

### 15 Disease-related data sources

16 [Table S2](#) lists our data sources. Below we provide a few additional comments and details not described in the text of the main  
17 paper.

### 18 Last wills and testaments.

19 **London 1348–1375:** Cohn (1) presents his monthly counts of wills (proved by the Court of Husting, London (2)) in his Figures  
20 7.33 (1348), 7.34 (1361) and 7.35 (1375); Cohn does not show data for 1368. Monthly aggregations of our daily counts agree  
21 nearly perfectly with Cohn’s plots for the three epidemics he studied. Most of the slight discrepancies are probably attributable  
22 to a small number of wills that were written during the plague epidemics but probated much later (so not included by Cohn  
23 (1)).

24 **London 1384–1678:** The wills proved by the Prerogative Court of Canterbury (PCC) provide a substantial sample of London  
25 wills, but certainly not all the wills written by Londoners at the time, as the following quote from the National Archives website  
26 makes clear.

27 “Most people who left a will used the appropriate church court. The Prerogative Court of Canterbury was the highest  
28 church court in England and Wales until 1858, when the national court was established, but even in the late 1850s it  
29 was only proving about 40% of the national total of 21,653 wills.

30 Until 1858 there were more than 200 church courts each of which kept separate registers of wills – there was no central  
31 index.

32 . . .

33 Wills proved in the Prerogative Court of Canterbury (PCC) mainly relate to testators resident in the south of England,  
34 although all parts of England and Wales are represented in the records.”

– [The UK National Archives](#)

35 Before the 17th century, the number of PCC wills is too small to detect an epidemic signal (see the PCC wills plotted in  
36 the top two panels of [Figure S6](#), which we have not used for growth rate estimates). Consequently, studying potential plague  
37 epidemics in the 15th century—after the period when many London wills were probated in the Court of Husting and before  
38 many London wills were probated in the Court of Canterbury—would probably require analysis of the records of a substantial  
39 fraction of church courts. Creighton (3, Ch. IV) gives numerous historical references that indicate specific plague epidemics in  
40 London between 1375 and 1540. Unfortunately, none of these sources provides an outbreak time series, so there is no possibility  
41 of estimating epidemic growth rates.

42 **Will dates vs. probate dates.** The Calendar of Wills probated in the Court of Husting (2) is organized by court dates, so every  
43 will is associated with a definite date on which it was probated; in contrast, only 64% of the wills provide information on the  
44 date of writing (4). Despite this lower sample size and the fact that wills were in some cases written long before death, dates of  
45 writing actually provide a much more plausible representation of the epidemic patterns in the 14th century than probate dates  
46 ([Figure S2](#)). Graphs in the main text ([Figures 1 to 3](#)) are based on counts of wills written. See “[Wills and testaments](#)” in the  
47 Data section of the main text for further discussion.

### 48 London Bills of Mortality (LBoM).

49 **London 1563–1583:** The earliest weekly plague mortality records are tabulated by Creighton (3) for 1563–1564 (3, p. 305) and  
50 1578–1583 (3, p. 341–344).

51 **London 1593:** The extant records of weekly plague mortality in London in 1593 ([Figure S6](#), second panel) are implausible.  
52 One possibility is that many earlier deaths were added to the counts for two of the weeks in July, but there is no way to be sure.  
53 Creighton (3, pp. 351–360) discusses all the data ever found for the epidemic of plague in 1592–1593, states that the weekly  
54 data probably originate from marginal notes in a broadside of 1603, and comments (p. 354) that “the weekly mortalities in it for  
55 those weeks that had little plague are an absurdity for 1593. Whatever the source of this table, it is not genuine for 1593 . . .”

56 **London 1603–1680:** Creighton (3) tabulates data for 1606–1610 (3, p. 494) and 1636 (3, p. 530). Bell (5) and Creighton (3)  
57 both tabulate weekly mortality from 1605 to the end of 1665, which includes the majority of the Great Plague in 1665–1666 (3,  
58 p. 662). We entered all weekly mortality data from 1662 to 1680 directly from the London Bills of Mortality.

59 **Parish registers.** Cummins *et al.* (6) obtained parish register data from [ancestry.com](#) and have made the weekly counts of  
60 deaths available at <http://neilcummins.com>. For the 16th and 17th century epidemics, the parish data provide a third source.  
61 For 1593, these are the only reliable data (we consider them to be reliable because they are part of a continuous weekly time  
62 series from 1538 onwards).

**Major vs minor plague epidemics.** Figure S3 shows all weekly reports of plague deaths from the LBoM from 1563 to 1666, scaled by population size (estimated by interpolating from Table S1). Epidemics with peak plague mortality above 5 per 1000 individuals per week were classified as *major*. With the exception of 1593 (for which we do not use LBoM data; see above), all these major epidemics peak above 14 on this scale; all the other (*minor*) epidemics peak below 3. The raw plague mortality data are shown in Figure S4.

We classify all the 14th century epidemics as ‘major’, although we do not have appropriate data to distinguish major from minor epidemics in this early epoch.

Weekly time series for all the major epidemics are shown in Figures S5 and S6.

### Generation interval for bubonic plague

For pneumonic plague, sufficiently detailed data exist for a number of modern outbreaks to allow an estimate of the latent and infectious periods (and hence of the generation interval distribution) (7), which we can use to estimate  $\mathcal{R}_0$  for a given value of  $r$  (8). Much less data is available for bubonic plague; in addition, the more complex host-vector life cycle of bubonic plague complicates the estimation of the generation interval. However, we can say that the elapsed time between the onset of infectiousness of a rat and the time when a rat in the next infection cycle becomes infectious is:

$$\begin{aligned}
 & \text{rat} \rightarrow \text{flea infection time} \\
 & + \max(\text{flea incubation period}, \{\text{time to rat death} + \text{flea searching time}\}) \\
 & + \text{flea} \rightarrow \text{rat infection time} \\
 & + \text{rat incubation period}
 \end{aligned} \tag{S1}$$

The second line above takes account of the fact that a flea leaves its rat host when, and only when, the rat dies (9). From (10), we can gather that

- fleas bite rats  $\approx 4$  times/day; the rat  $\rightarrow$  flea infection probability is  $\approx 0.2$  and the flea  $\rightarrow$  rat infection probability is  $\approx 0.28$ , suggesting that both the rat  $\rightarrow$  flea and flea  $\rightarrow$  rat infection times are  $\approx 1$  day;
- the rat infectious period (time until infected rats die) is  $\approx 4$  days ((10) cite (11) for this value; (12) give a value of  $\approx 18$  days, which seems unrealistically long — another source, (13), gives values ranging from  $\approx 4$ –9 days)
- the flea incubation period is long (but very variable), ranging from 9–26 days ((10), citing (14))
- the flea searching time is not explicitly defined by (10), but we guess it is relatively short ( $< 1$ –2 days)
- (10) give a value of  $\approx 1$ –3 days for the rat incubation period

Since the flea incubation period is typically longer than the combination of rat death time and flea searching time (9–26 days vs. (4–9 + 1–2) days), we can approximate the generation interval as  $\approx (1 \text{ day}) + (9\text{--}26 \text{ days}) + (1 \text{ day}) + (1\text{--}3 \text{ days})$ ; we use a value of  $T_g = 18$  days in the main text.

### Relationship between rat density and $\mathcal{R}_0$ (in rats)

One factor that might have contributed to the observed increase in epidemic growth rates in London is the density of rats. We do not have data that allow us to estimate rat densities in Medieval England, but we can ask—all else being equal—by what factor would rat density have to have changed in order to account for the observed change in growth rates?

In the idealized situation in which the generation interval is exponentially distributed (as in the standard SIR model) then (8), as mentioned in the Discussion in the main text,

$$r = \frac{\mathcal{R}_0 - 1}{T_g}, \tag{S2}$$

where  $T_g$  is the mean generation interval. Consequently, if this simple relationship holds and the mean generation interval *does not change*, then a change in growth rate  $r_1 \rightarrow r_2$  implies a change in basic reproduction number  $\mathcal{R}_{0,1} \rightarrow \mathcal{R}_{0,2}$ , where

$$\frac{\mathcal{R}_{0,2}}{\mathcal{R}_{0,1}} = \frac{r_2 T_g + 1}{r_1 T_g + 1}. \tag{S3}$$

If we assume the estimate of  $T_g = 18$  days obtained above, and the MLE growth rates from early and late wills listed in Table 1, the relative change in reproduction number that needs explanation is

$$\frac{\mathcal{R}_{0,2}}{\mathcal{R}_{0,1}} \approx \frac{23 \cdot \frac{18}{365} + 1}{5.86 \cdot \frac{18}{365} + 1} \approx \frac{2.13}{1.29} \approx 1.65. \tag{S4}$$

where the second subscript (1 or 2) denotes the early or late epoch, respectively.

Keeling and Gilligan (12, p. 2226) relate the basic reproduction number to rat density via

$$\mathcal{R}_0 = \frac{\beta_{\text{R}} K_{\text{F}}}{d_{\text{F}}} \left[ 1 - \exp(-a K_{\text{R}}) \right], \quad [S5]$$

where  $\beta$  and  $K$  denote transmission rate and carrying capacity, respectively, and the subscripts F and R denote fleas and rats, respectively. Equation (S5) implies

$$\frac{\mathcal{R}_{0,2}}{\mathcal{R}_{0,1}} = \frac{1 - \exp(-a K_{\text{R},2})}{1 - \exp(-a K_{\text{R},1})}, \quad [S6]$$

which, for  $a K_{\text{R},j} \ll 1$ , simplifies to

$$\frac{\mathcal{R}_{0,2}}{\mathcal{R}_{0,1}} \approx \frac{K_{\text{R},2}}{K_{\text{R},1}}. \quad [S7]$$

The approximation (appropriate in the limit  $aK \rightarrow 0$ ) provides a lower bound to the true relationship, indicating that rat density would have had to increase by at least a factor of 1.65 to account for a similar increase [Equation (S4)] in  $\mathcal{R}_0$ .

Figure S7 shows the exact relationship [Equation (S6)] for several values of  $aK_{\text{R},1}$ , together with the approximation for small  $aK$  [Equation (S7)]. Keeling and Gilligan (12, Table 1, p. 2221) adopt values of  $a$  and  $K_{\text{R}}$  that yield  $aK_{\text{R}} = 10$ . If this is the correct order of magnitude for  $aK_{\text{R},1}$  then Equation (S6) implies that no increase in rat density would be sufficient to yield an increase in  $\mathcal{R}_0$  by a factor of 1.65 (or any factor detectably greater than 1).

## Effects of rat ecology on growth rates

In the Discussion in the main text, we listed “ecological and demographic changes” as a possible cause of acceleration of plague epidemics. Could changes in rat ecology plausibly have contributed to changes in epidemic growth rates?

As a vector-borne disease, the rate of bubonic plague spread is primarily affected by the flea-rat ratio. In the traditional Ross-MacDonald model for vector-borne epidemics,  $\mathcal{R}_0$  is proportional to the square of vector-host ratio because vectors must independently bite hosts twice (once to become infected and a second time to infect a susceptible host). In the rat-flea model,  $\mathcal{R}_0$  is instead proportional to  $V/H$  because *all* infected fleas on a host disperse and bite other hosts when their initial host dies. From Keeling and Gilligan’s plague model (12), the expected change in  $r$  for a change in flea-rat ratio from  $K_{\text{F}0}$  to  $K_{\text{F}}$  is  $(K_{\text{F}}/K_{\text{F}0})^S$ , where  $S$  is the sensitivity ( $\approx 1.5$ ). Thus in order to see a fourfold increase in  $r$  we would need a change of  $4^{(1/S)} \approx 2.5$ , not in the rat density, but in the number of fleas per rat, which seems unlikely.

As noted in the main text, rat density has an additional, indirect effect on growth rate  $r$  and reproduction number  $\mathcal{R}_0$ : increasing rat density will increase the probability that fleas leaving dying rats will find new, susceptible rat hosts. To crudely estimate the magnitude of this effect, if we again consider Keeling and Gilligan’s model (12) then the maximum possible effect of rat density on  $\mathcal{R}_0$  by this mechanism would be proportional (if fleas have very low success in finding new rat hosts). That is, in order for  $\mathcal{R}_{0,B}$  to increase from  $\approx 1.3$  in the 14th century to  $\approx 2.1$  in the late epoch, rat density would have to increase by at least 62%. If fleas were already fairly successful at finding hosts in the 14th century, then changes in rat density would be expected to have only a small effect on  $\mathcal{R}_0$  in rats.

## Analysis of delays between wills and other sources

In order to determine the relative timing of epidemics recorded by different sources, we interpolated the parish data (which are recorded at different times from the LBoM) to find values corresponding to the LBoM dates. We quantify the relative timing in two different ways, (1) measuring the maximum cross-correlation and the lag at which this cross-correlation occurs, and (2) measuring the time difference between the epidemic peaks. As expected, the parish records are strongly correlated with LBoM (maximum correlation 0.97–0.996) and approximately synchronous (CCF lag 0–1 weeks, peak lag -0.7–1.1 weeks). The wills data are more weakly correlated (maximum correlation 0.49–0.73) and more delayed (CCF lag 3–10 weeks, peak lag 3.3–5.4 weeks).

## Details of numerical optimization

Robustly fitting phenomenological epidemic curves to small, noisy data sets proved to be surprisingly challenging\*. In the course of developing the full model we experimented with a range of optimizers — specifically the BFGS and Nelder-Mead options for R’s `optim` function as well as R’s `nlminb` function; we also tried an approach that iterated back and forth between Nelder-Mead and BFGS until convergence was achieved or the fit was sufficiently stable. We chose `nlminb` because it gave the best results (highest log likelihood) for point estimates. In general, we used the standard link functions proposed by Ma *et al.* (15), i.e., fitting most of the parameters (growth rate  $r$ , background mortality/wills rate  $b$ , final size  $K$ , Richards shape parameter  $s$ ) on the log scale with a scaled-tangent link ( $\eta = \tan(\pi/2 \cdot (x/2 - 1))$ ) for the initial condition  $x_0$ . However, we found that the scaled-tangent link declined too slowly in the tails, leading to numerical instability; we replaced it with a more standard logit link ( $\eta = \log(x/(1-x))$ ).

With this approach we failed to achieve good (convergent) fits for only three combinations of source and outbreak year, all for minor outbreaks (London bills for 1578 and 1582, Canterbury wills for 1581); these cases are excluded from the tables and figures shown below.

\*See “monsters in the basement”, <https://redpenblackpen.tumblr.com/post/145304820562/monsters-in-the-basement>.

In the future, we would suggest that further work on reparameterization, including parameterizing the logistic by the time at which half of the final size is achieved rather than by the initial number infected, and possibly the reparameterization and regularization methods suggested by (16) for the Richards model, would be useful.

**Supplementary tables cited in the main text**

[Tables S4 to S7.](#)

**Supplementary figure cited in the main text**

[Figure S8.](#)

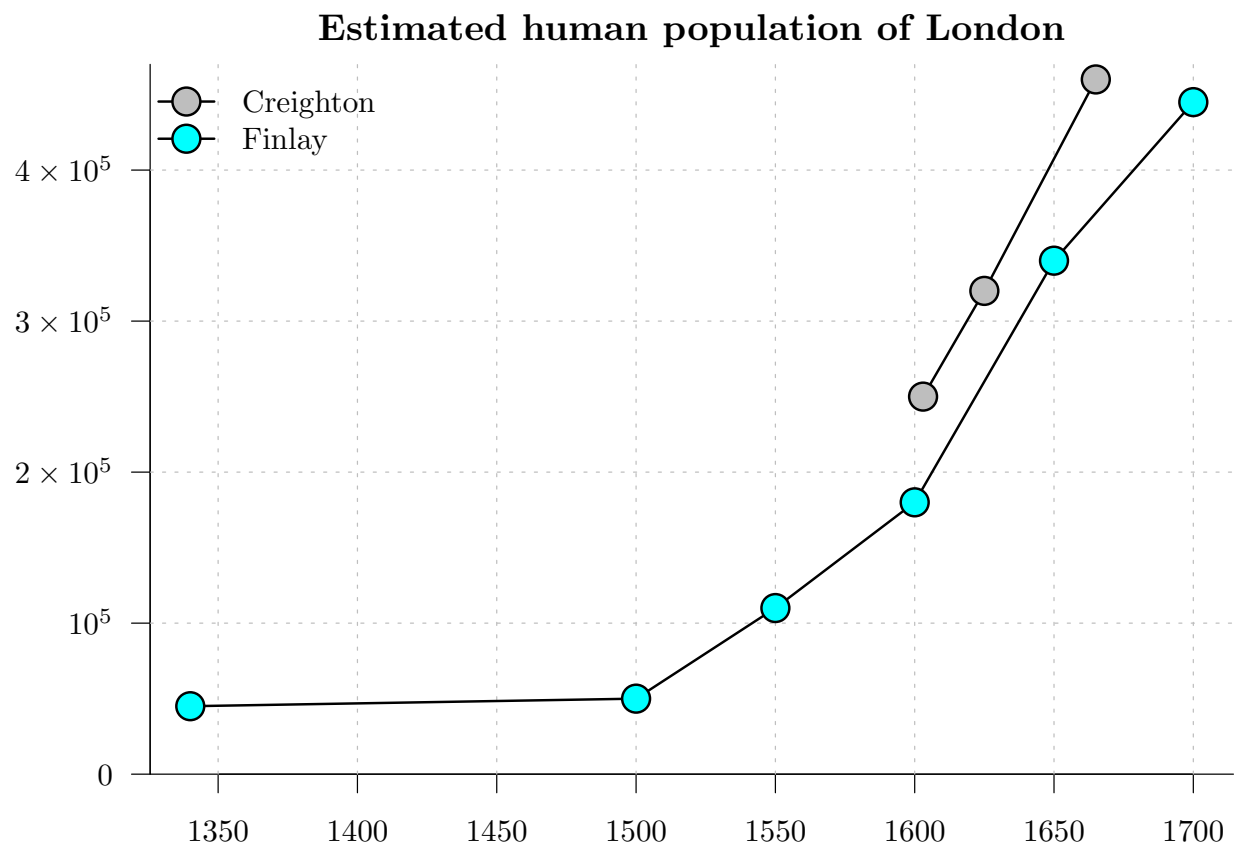

**Fig. S1.** Historical population of London, England, as estimated by Finlay (17, 18) (Table S1). Earlier estimates of Creighton (3, p. 660) are shown for the specific plague years 1603, 1625 and 1665.

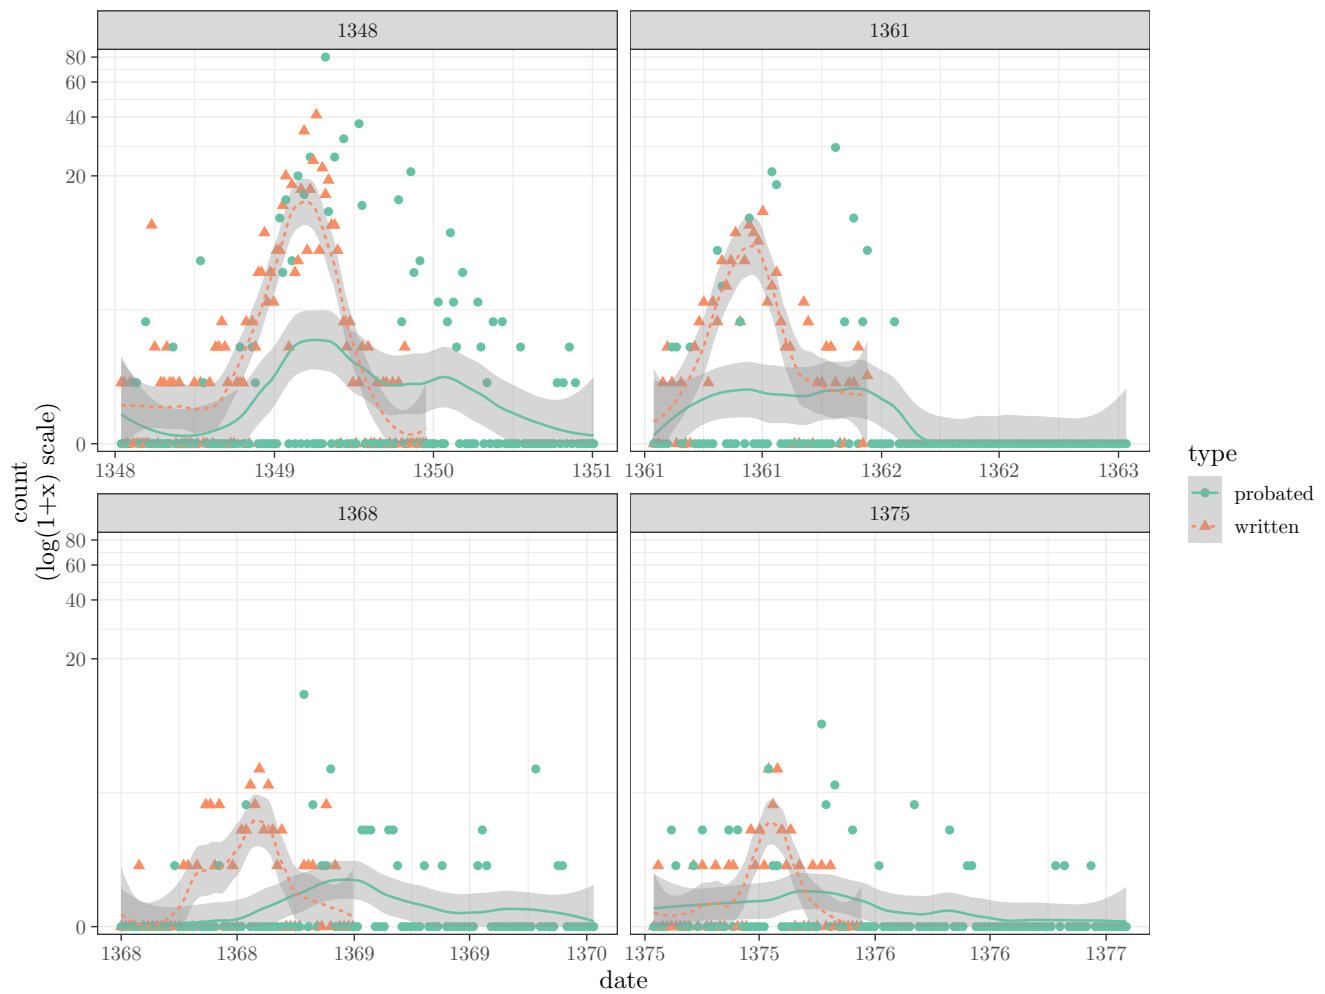

**Fig. S2.** Counts of wills written vs. wills probated during each of the four 14th century plague epidemics in London, based on wills probated in the Court of Husting (2). Smooth lines represent loess fits with  $\text{span}=0.5$  (shaded regions are 95% confidence intervals).

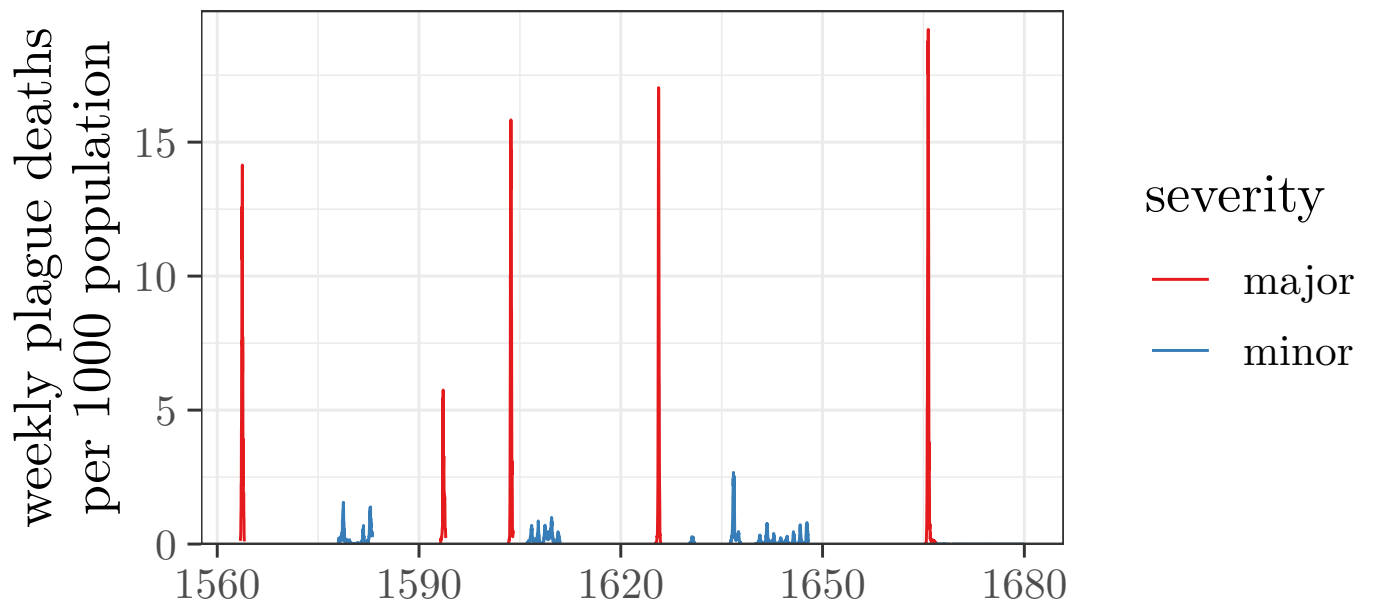

**Fig. S3.** Plague deaths per 1000 persons per week, from 1563 to 1666. Epidemics that exceeded 5 on this scale were classified as *major*. Analysis of the major epidemics is shown in [Table 1](#) and [Figures 2](#) and [3](#). Corresponding analyses of all of the minor epidemics are presented in [Table S5](#) and [Figure S8](#).



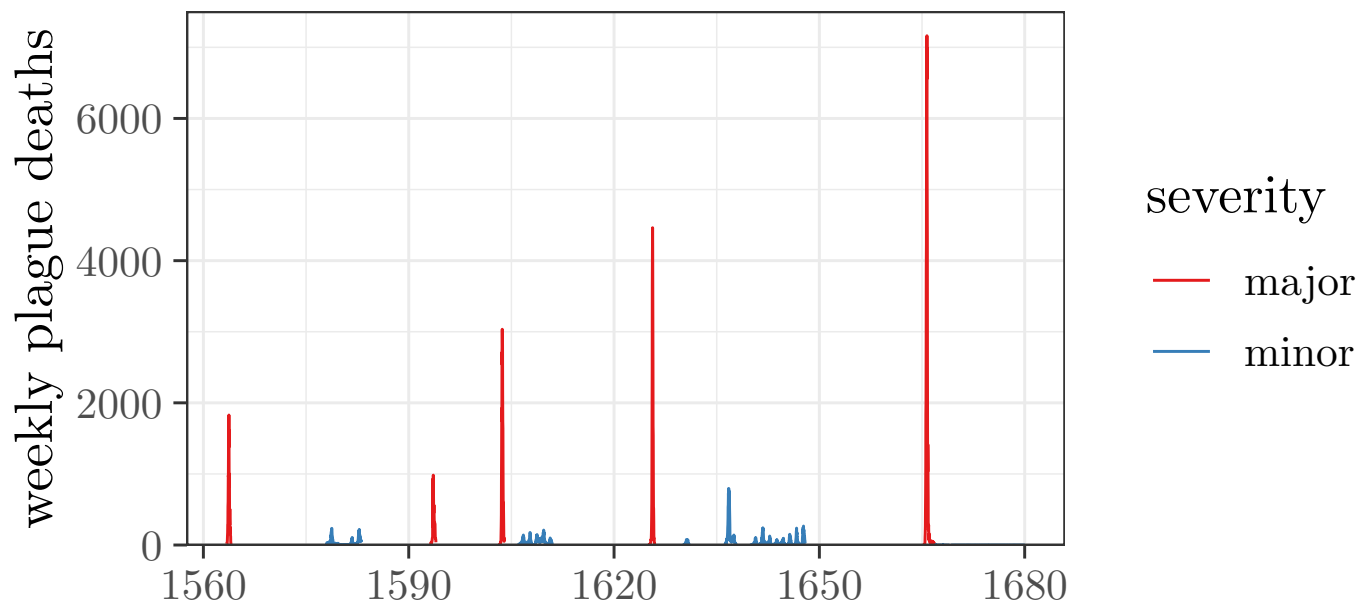

Fig. S4. All plague deaths reported in London from 1563 to 1666.

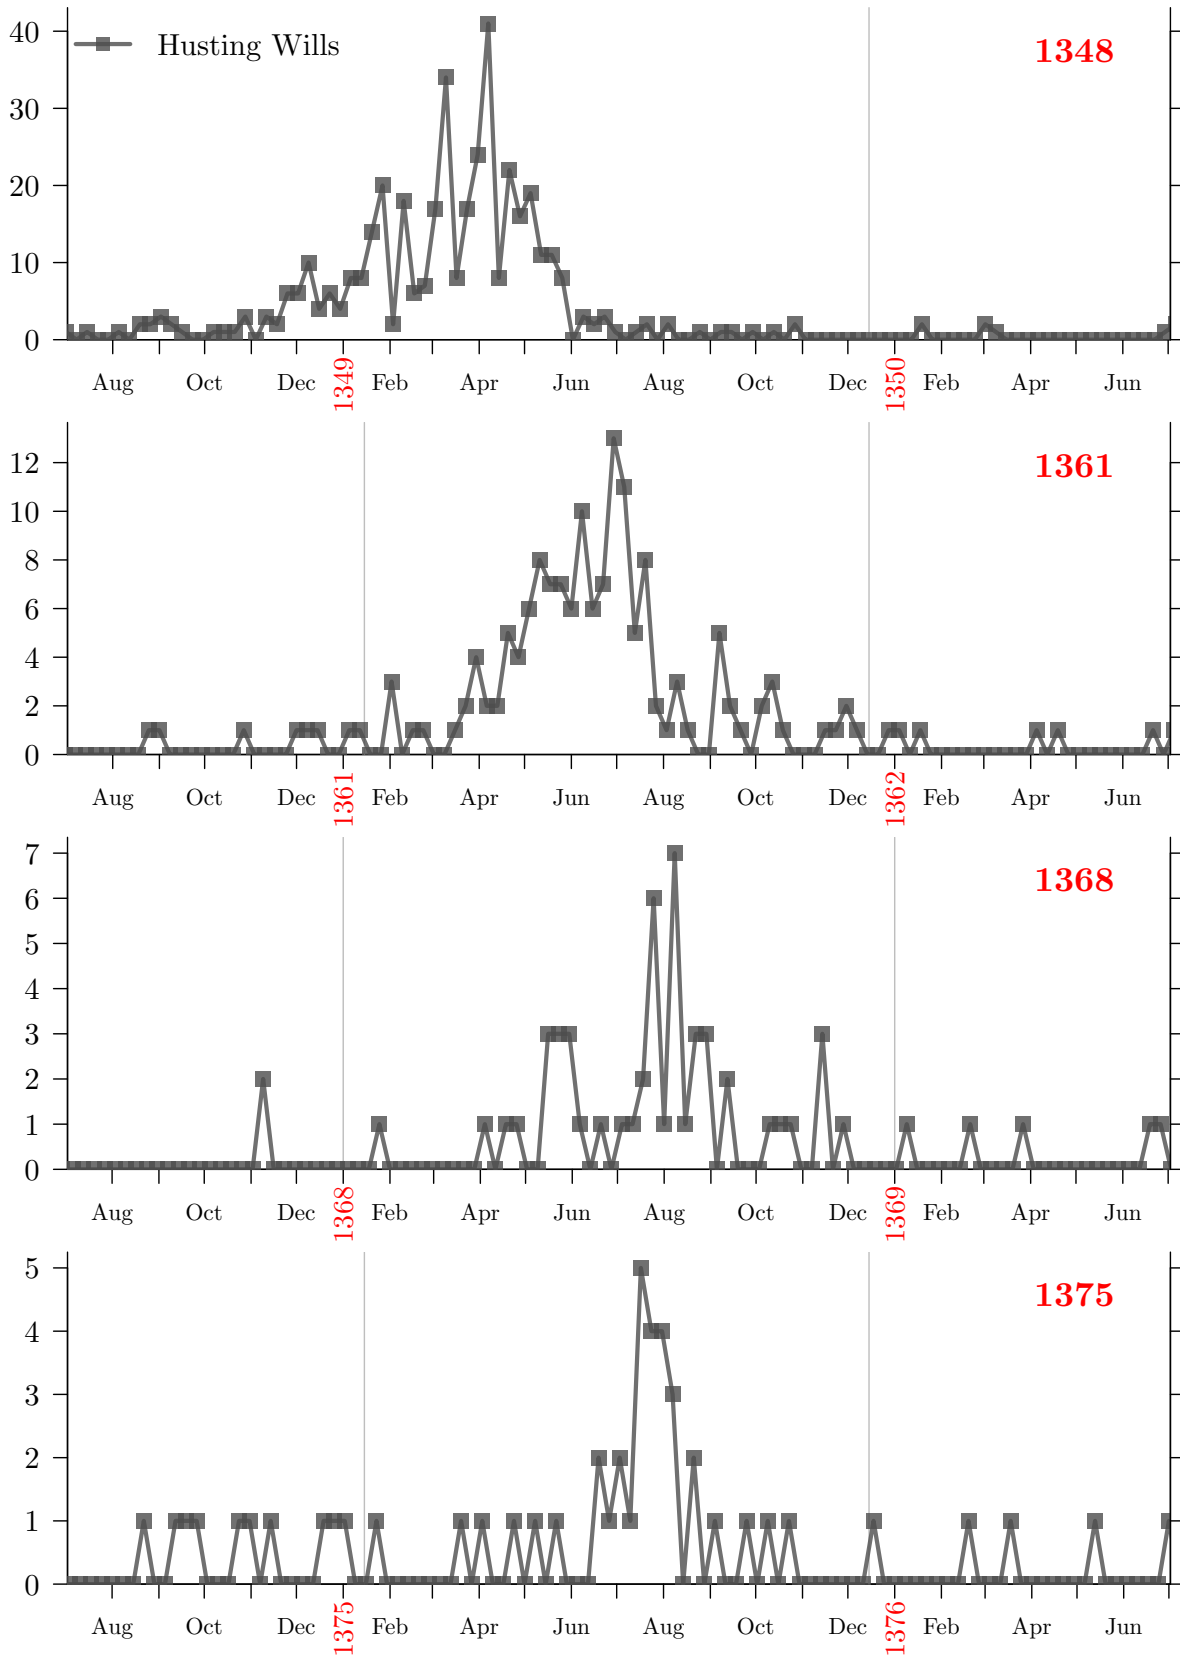

**Fig. S5.** Weekly numbers of wills written during plague epidemics in London, England, in the 14th century. Vertical grey lines indicate the “outbreak window” specified in [Table S6](#).

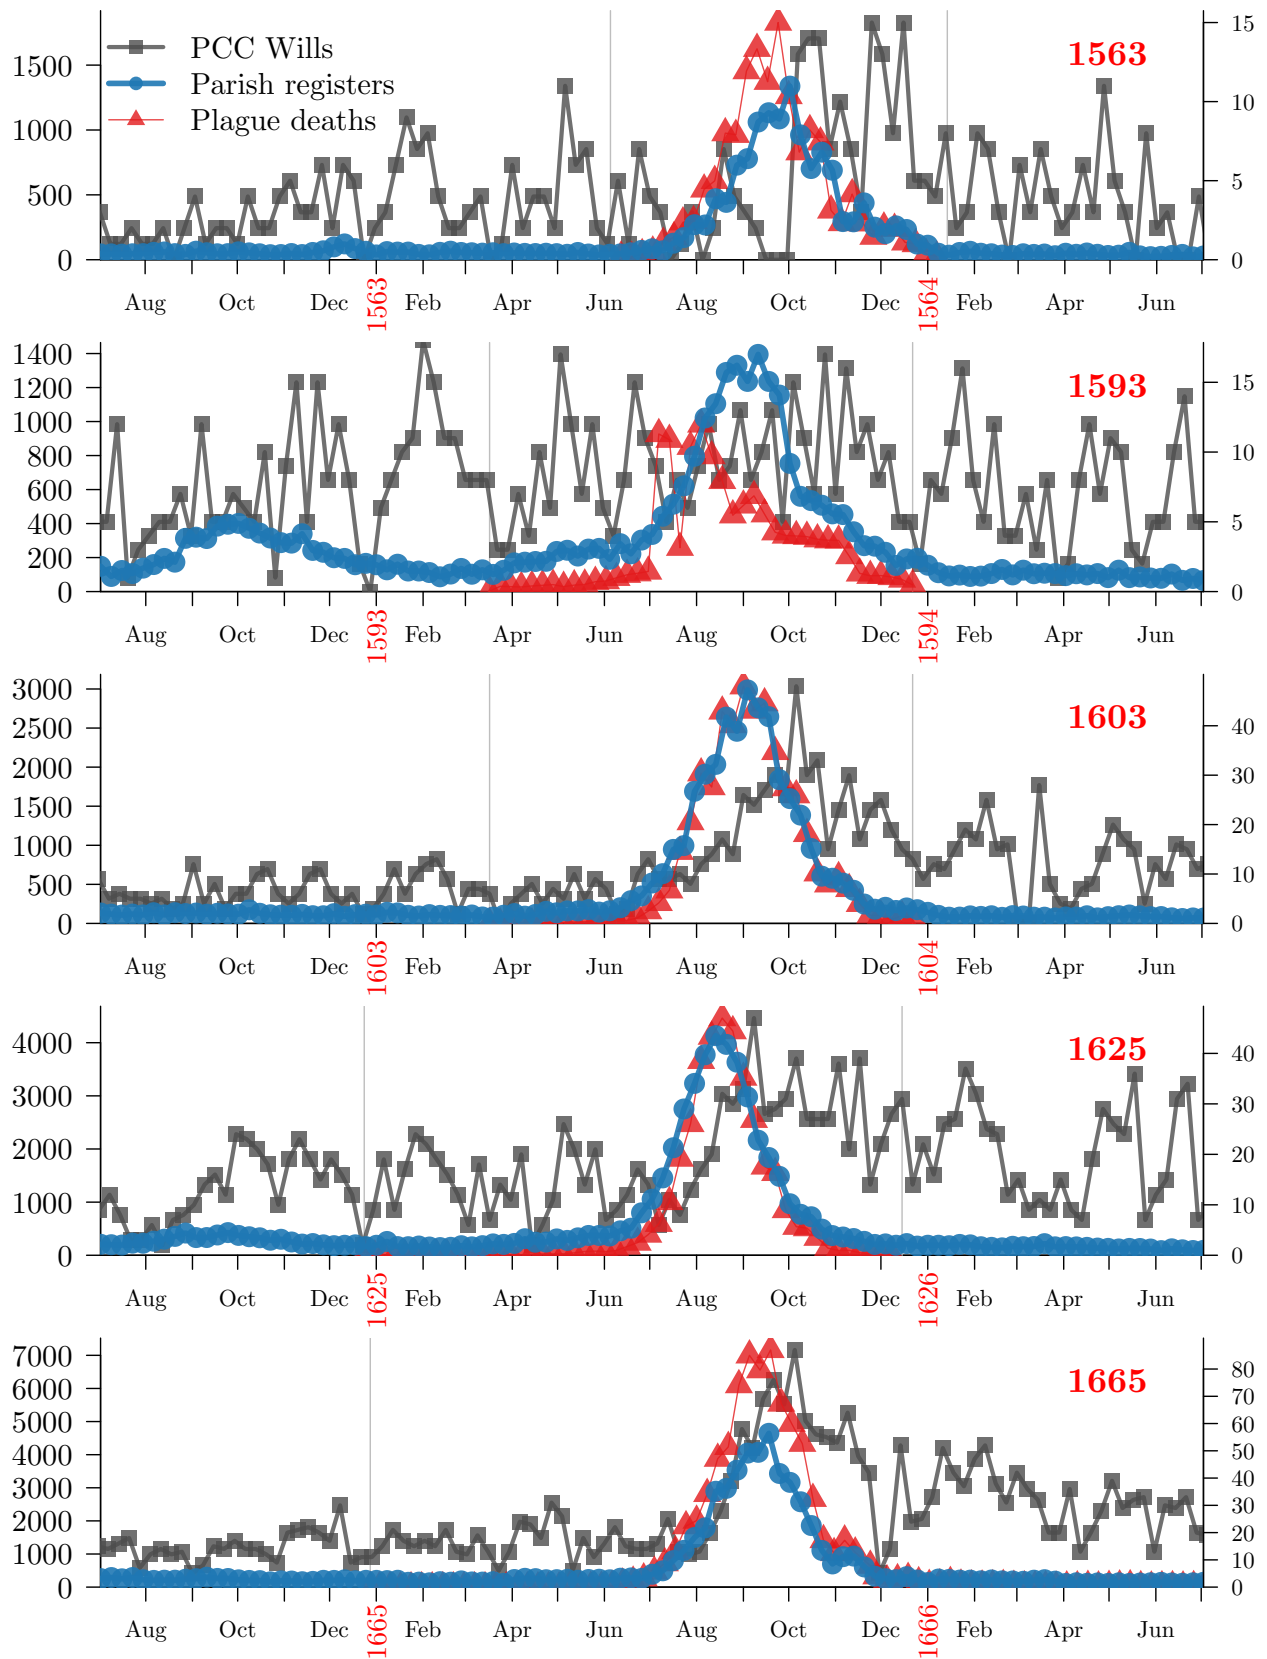

**Fig. S6.** Weekly deaths and numbers of wills written during major plague epidemics in London, England, since 1540. For each epidemic, vertical grey lines indicate the beginning and end of the period during which deaths from plague were listed in the bills of mortality. The left (right) scale refers to deaths (wills).

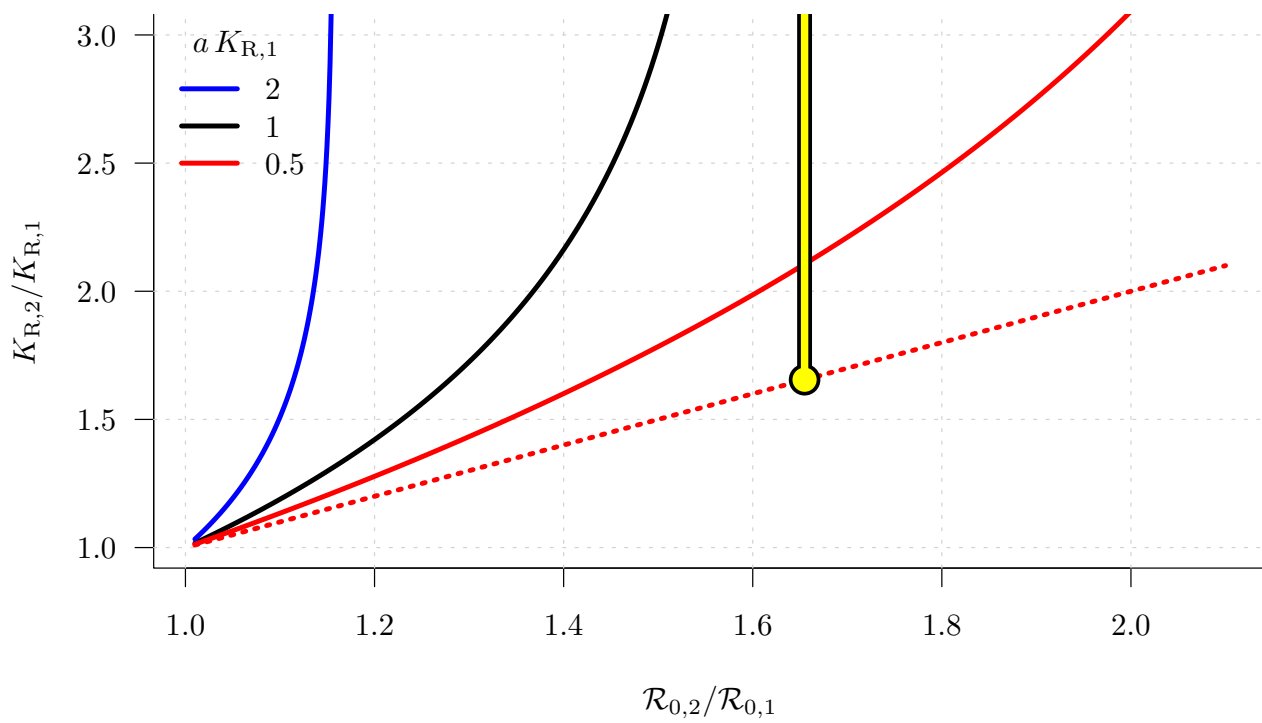

**Fig. S7.** Relative change in rat carrying capacity  $K_R$  as a function of relative change in basic reproduction number  $\mathcal{R}_0$ . Solid curves are based on Equation (S6). The dotted red line is based on Equation (S7). The 1.65-fold increase in  $\mathcal{R}_0$  that requires explanation is indicated in yellow.

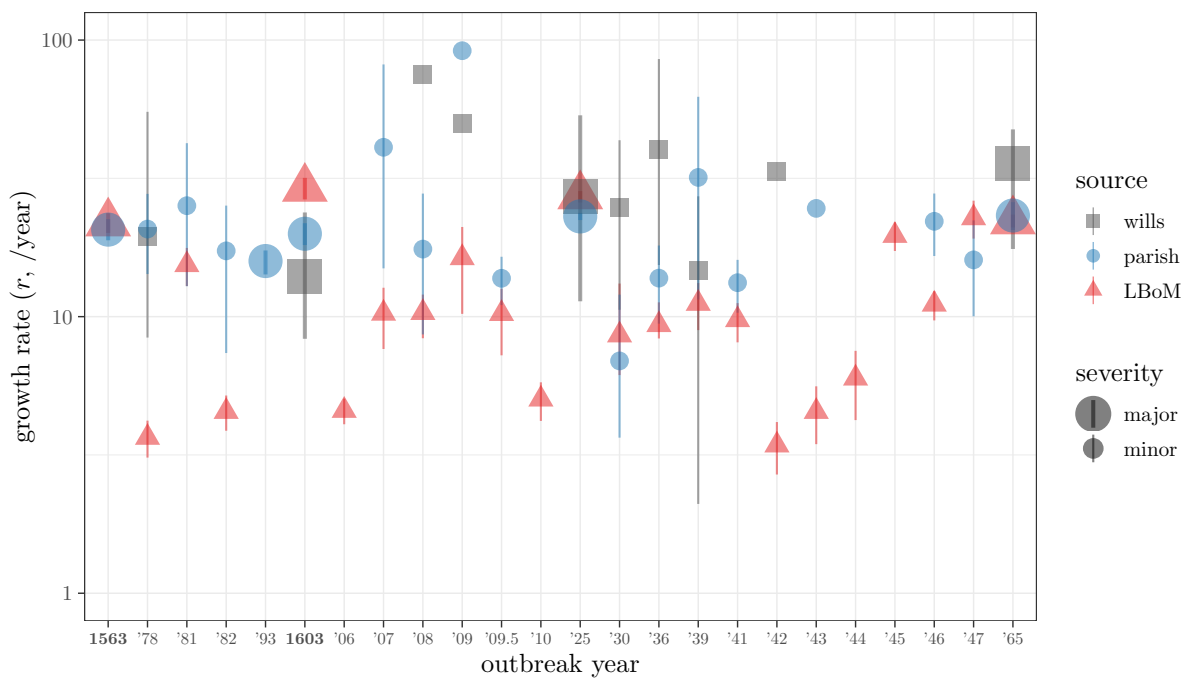

**Fig. S8.** Growth rate estimates for all the late epoch (1540–1680) London plague epidemics. The growth rates shown for the major epidemics are the same as those in the right panel of [Figure 3](#). See [Tables 1](#) and [S5](#).

**Table S1. Population estimates for London previously published by Finlay (17, 18)(19, p. 108) and Creighton (3, p. 660). These data are plotted in Figure S1.**

| <b>Year</b> | <b>Population</b> | <b>Source</b> |
|-------------|-------------------|---------------|
| 1340        | 45,000            | Finlay        |
| 1500        | 50,000            | Finlay        |
| 1550        | 110,000           | Finlay        |
| 1600        | 180,000           | Finlay        |
| 1603        | 250,000           | Creighton     |
| 1625        | 320,000           | Creighton     |
| 1650        | 340,000           | Finlay        |
| 1665        | 460,000           | Creighton     |
| 1700        | 445,000           | Finlay        |

**Table S2. Disease-related data used in this paper.**

| <b>Epoch</b> | <b>Year range</b> | <b>Data type</b>          | <b>Frequency</b> | <b>Source</b>                         |
|--------------|-------------------|---------------------------|------------------|---------------------------------------|
| Early        | 1340–1380         | Last Wills and Testaments | Daily            | Court of Husting                      |
| Late         | 1540–1680         | Last Wills and Testaments | Daily            | Prerogative Court of Canterbury (PCC) |
|              | 1540–1680         | Mortality from all causes | Weekly           | Parish records                        |
|              | 1563–1666         | Mortality from plague     | Weekly           | London Bills of Mortality (LBoM)      |

**Table S3. Observed cross-correlation and delay between London Bills of Mortality (LBoM) records and other sources. All lags measured in weeks. Rows corresponding to wills data are highlighted in grey.**

| source | outbreak year | CCF lag | max CCF | peak    | peak lag |
|--------|---------------|---------|---------|---------|----------|
| parish | 1563          | 1       | 0.966   | 1563.75 | 1.07     |
| parish | 1603          | 0       | 0.993   | 1603.68 | 0.23     |
| wills  | 1603          | 4       | 0.489   | 1603.78 | 5.45     |
| parish | 1625          | 0       | 0.986   | 1625.62 | -0.68    |
| wills  | 1625          | 10      | 0.486   | 1625.71 | 4.28     |
| parish | 1665          | 0       | 0.996   | 1665.70 | 0.15     |
| wills  | 1665          | 3       | 0.726   | 1665.76 | 3.30     |



Table S4. Summary statistics for the model estimating differences across epochs. All parameters are in units of log(growth rate)/year. The model includes fixed effects of epoch (early [14th c.] vs. late [16th - 17th c.]) and source (wills, parish, London Bills of Mortality) and a random effect of outbreak year. Variability for each observation is assumed to be proportional to the uncertainty in its  $\log(r)$  estimate (see main text, *Growth rate estimates*). In Wilkinson-Rogers notation, the model formula is:  $\log.r \sim \text{epoch} + \text{source} + (1|\text{outbreak.year})$ ,  $\text{disp} \sim 1 + \text{offset}(\log(\text{sdvals}^2))$ . Parameter estimates are given on the  $\log(r)$  scale; Wald confidence intervals are given in parentheses.

|                                           | estimate | 95% CI           |
|-------------------------------------------|----------|------------------|
| Intercept (14th-c. wills log growth rate) | 1.768    | (1.250 – 2.286)  |
| epoch (late vs. early)                    | 1.366    | (0.517 – 2.215)  |
| source (parish vs. wills)                 | -0.118   | (-0.786 – 0.550) |
| source (LBoM vs. wills)                   | 0.039    | (-0.628 – 0.707) |
| nobs                                      | 16       |                  |

**Table S5. Parameter estimates for minor plague epidemics (cf. Figure S8). Plague epidemics with  $\hat{r} < 1/\text{yr}$  or  $\hat{r} > 100/\text{yr}$ , representing unreliable fits, are excluded; confidence limits that are  $< 0.1$  or  $> 200$  are replaced with NA. See *Methods* in main text.**

| Source | Epidemic | Growth rate [1/year] | Doubling time [days] | $R^2$ |
|--------|----------|----------------------|----------------------|-------|
| Wills  | 1578     | 19.4 (8.4, 55.0)     | 13.0 (4.6, 30.1)     | 0.404 |
| LBoM   | 1578     | 3.7 (3.1, 4.2)       | 69.2 (60.1, 81.8)    | 0.825 |
| Parish | 1578     | 20.7 (14.3, 27.8)    | 12.2 (9.1, 17.7)     | 0.927 |
| LBoM   | 1581     | 15.4 (12.9, 17.7)    | 16.4 (14.3, 19.6)    | 0.915 |
| Parish | 1581     | 25.2 (12.9, 42.4)    | 10.0 (6.0, 19.6)     | 0.784 |
| LBoM   | 1582     | 4.5 (3.9, 5.2)       | 55.8 (48.8, 65.4)    | 0.806 |
| Parish | 1582     | 17.3 (7.4, 25.2)     | 14.6 (10.0, 34.3)    | 0.794 |
| LBoM   | 1606     | 4.6 (4.1, 5.1)       | 55.3 (50.1, 62.0)    | 0.911 |
| LBoM   | 1607     | 10.3 (7.6, 12.7)     | 24.6 (19.9, 33.1)    | 0.947 |
| Parish | 1607     | 41.0 (14.9, 81.6)    | 6.2 (3.1, 16.9)      | 0.757 |
| Wills  | 1608     | 74.8 (25.8, 146.8)   | 3.4 (1.7, 9.8)       | 0.670 |
| LBoM   | 1608     | 10.3 (8.4, 12.0)     | 24.5 (21.1, 30.3)    | 0.921 |
| Parish | 1608     | 17.5 (8.6, 27.9)     | 14.4 (9.1, 29.3)     | 0.728 |
| Wills  | 1609     | 50.1 (13.0, 113.9)   | 5.1 (2.2, 19.5)      | 0.403 |
| LBoM   | 1609     | 16.3 (10.2, 21.1)    | 15.5 (12.0, 24.7)    | 0.863 |
| Parish | 1609     | 91.5 (7.9, NA)       | 2.8 (1.1, 31.9)      | 0.608 |
| LBoM   | 1609.5   | 10.2 (7.2, 12.6)     | 24.7 (20.1, 34.9)    | 0.888 |
| Parish | 1609.5   | 13.8 (11.0, 16.5)    | 18.4 (15.4, 23.0)    | 0.954 |
| LBoM   | 1610     | 5.0 (4.2, 5.8)       | 50.3 (43.7, 60.3)    | 0.897 |
| Wills  | 1630     | 24.8 (10.6, 43.4)    | 10.2 (5.8, 23.9)     | 0.415 |
| LBoM   | 1630     | 8.6 (6.1, 13.2)      | 29.5 (19.2, 41.2)    | 0.846 |
| Parish | 1630     | 6.9 (3.7, 12.0)      | 36.6 (21.1, 69.3)    | 0.665 |
| Wills  | 1636     | 40.3 (15.4, 85.4)    | 6.3 (3.0, 16.5)      | 0.663 |
| LBoM   | 1636     | 9.3 (8.3, 11.3)      | 27.1 (22.5, 30.3)    | 0.947 |
| Parish | 1636     | 13.8 (9.4, 18.1)     | 18.4 (14.0, 26.8)    | 0.959 |
| Wills  | 1639     | 14.6 (2.1, 27.2)     | 17.3 (9.3, 120.3)    | 0.063 |
| LBoM   | 1639     | 11.2 (8.9, 13.2)     | 22.7 (19.1, 28.3)    | 0.958 |
| Parish | 1639     | 31.9 (11.5, 62.4)    | 7.9 (4.1, 21.9)      | 0.575 |
| LBoM   | 1641     | 9.7 (8.1, 11.2)      | 26.0 (22.6, 31.3)    | 0.964 |
| Parish | 1641     | 13.3 (10.3, 16.0)    | 19.1 (15.8, 24.5)    | 0.974 |
| Wills  | 1642     | 33.4 (6.2, NA)       | 7.6 (1.1, 40.5)      | 0.643 |
| LBoM   | 1642     | 3.4 (2.7, 4.2)       | 73.8 (60.8, 94.2)    | 0.757 |
| LBoM   | 1643     | 4.5 (3.5, 5.6)       | 55.8 (45.2, 73.1)    | 0.766 |
| LBoM   | 1644     | 6.0 (4.2, 7.5)       | 42.3 (33.6, 59.9)    | 0.860 |
| LBoM   | 1645     | 19.6 (17.3, 21.9)    | 12.9 (11.5, 14.6)    | 0.978 |
| LBoM   | 1646     | 11.1 (9.7, 12.4)     | 22.8 (20.5, 26.1)    | 0.843 |
| Parish | 1646     | 22.1 (16.6, 27.9)    | 11.4 (9.1, 15.3)     | 0.946 |
| LBoM   | 1647     | 22.7 (19.2, 26.3)    | 11.1 (9.6, 13.2)     | 0.871 |
| Parish | 1647     | 16.0 (10.0, 22.3)    | 15.8 (11.4, 25.2)    | 0.710 |

**Table S6. Outbreak windows and fitting windows used in fitting the major plague epidemics. See [Methods](#) in main text.**

| Source           | Outbreak Year | Outbreak Window |             | Fitting Window |             |
|------------------|---------------|-----------------|-------------|----------------|-------------|
|                  |               | start           | end         | start          | end         |
| Husting wills    | 1348          | 15 Jan 1348     | 15 Dec 1349 | 20 Jan 1348    | 13 Apr 1349 |
| Husting wills    | 1361          | 15 Jan 1361     | 15 Dec 1361 | 04 Feb 1361    | 08 Jul 1361 |
| Husting wills    | 1368          | 01 Jan 1368     | 01 Jan 1369 | 31 Jan 1368    | 26 Jul 1368 |
| Husting wills    | 1375          | 15 Jan 1375     | 15 Dec 1375 | 25 Jan 1375    | 21 Jul 1375 |
| London parish    | 1563          | 04 Jun 1563     | 15 Jan 1564 | 04 Jun 1563    | 08 Oct 1563 |
| London bills     | 1563          | 05 Jun 1563     | 14 Jan 1564 | 19 Jun 1563    | 01 Oct 1563 |
| Canterbury wills | 1563          | 05 Jun 1563     | 14 Jan 1564 | 08 Jun 1563    | 14 Oct 1563 |
| London bills     | 1593          | 17 Mar 1593     | 22 Dec 1593 | 17 Mar 1593    | 11 Aug 1593 |
| Canterbury wills | 1593          | 17 Mar 1593     | 22 Dec 1593 | 16 Jun 1593    | 31 Oct 1593 |
| London parish    | 1593          | 19 Mar 1593     | 25 Dec 1593 | 11 Jun 1593    | 17 Sep 1593 |
| London bills     | 1603          | 17 Mar 1603     | 22 Dec 1603 | 16 Jun 1603    | 08 Sep 1603 |
| Canterbury wills | 1603          | 17 Mar 1603     | 22 Dec 1603 | 18 Mar 1603    | 13 Oct 1603 |
| London parish    | 1603          | 19 Mar 1603     | 25 Dec 1603 | 19 Mar 1603    | 10 Sep 1603 |
| London bills     | 1625          | 24 Dec 1624     | 15 Dec 1625 | 02 Jun 1625    | 25 Aug 1625 |
| Canterbury wills | 1625          | 24 Dec 1624     | 15 Dec 1625 | 15 Jun 1625    | 14 Sep 1625 |
| London parish    | 1625          | 25 Dec 1624     | 18 Dec 1625 | 11 Jun 1625    | 20 Aug 1625 |
| London parish    | 1665          | 25 Dec 1664     | 18 Dec 1666 | 25 Dec 1664    | 24 Sep 1665 |
| London bills     | 1665          | 28 Dec 1664     | 18 Dec 1666 | 13 Jun 1665    | 26 Sep 1665 |
| Canterbury wills | 1665          | 28 Dec 1664     | 18 Dec 1666 | 28 Dec 1664    | 27 Sep 1665 |

**Table S7. The start and end dates for the fitting windows used in fitting the minor plague epidemics. See [Methods](#) in main text.**

| Source           | Outbreak Year | Outbreak Window |             | Fitting Window |             |
|------------------|---------------|-----------------|-------------|----------------|-------------|
|                  |               | start           | end         | start          | end         |
| London parish    | 1578          | 25 Dec 1577     | 23 Apr 1581 | 25 Dec 1577    | 08 Oct 1578 |
| London bills     | 1578          | 26 Dec 1577     | 20 Apr 1581 | 26 Dec 1577    | 09 Oct 1578 |
| Canterbury wills | 1578          | 26 Dec 1577     | 20 Apr 1581 | 07 Jan 1578    | 22 Nov 1578 |
| London bills     | 1581          | 27 Apr 1581     | 18 Jan 1582 | 01 Jun 1581    | 05 Oct 1581 |
| Canterbury wills | 1581          | 27 Apr 1581     | 18 Jan 1582 | 27 Apr 1581    | 14 Jun 1581 |
| London parish    | 1581          | 30 Apr 1581     | 15 Jan 1582 | 30 Apr 1581    | 08 Oct 1581 |
| London parish    | 1582          | 22 Jan 1582     | 22 Jan 1583 | 22 Jan 1582    | 29 Oct 1582 |
| London bills     | 1582          | 25 Jan 1582     | 24 Jan 1583 | 25 Jan 1582    | 25 Oct 1582 |
| Canterbury wills | 1582          | 25 Jan 1582     | 24 Jan 1583 | 25 Jan 1582    | 04 Jul 1582 |
| London parish    | 1606          | 25 Dec 1605     | 04 Jun 1607 | 25 Dec 1605    | 17 Sep 1606 |
| London bills     | 1606          | 26 Dec 1605     | 04 Jun 1607 | 26 Dec 1605    | 09 Oct 1606 |
| Canterbury wills | 1606          | 26 Dec 1605     | 04 Jun 1607 | 30 Dec 1605    | 21 Feb 1607 |
| London bills     | 1607          | 11 Jun 1607     | 04 Feb 1608 | 11 Jun 1607    | 01 Oct 1607 |
| Canterbury wills | 1607          | 11 Jun 1607     | 04 Feb 1608 | 11 Jun 1607    | 20 Nov 1607 |
| London parish    | 1607          | 11 Jun 1607     | 05 Feb 1608 | 11 Jun 1607    | 08 Oct 1607 |
| London bills     | 1608          | 11 Feb 1608     | 23 Feb 1609 | 07 Apr 1608    | 07 Oct 1608 |
| Canterbury wills | 1608          | 11 Feb 1608     | 23 Feb 1609 | 11 Feb 1608    | 08 May 1608 |
| London parish    | 1608          | 12 Feb 1608     | 26 Feb 1609 | 12 Feb 1608    | 24 Sep 1608 |
| London bills     | 1609          | 02 Mar 1609     | 08 Jun 1609 | 02 Mar 1609    | 04 May 1609 |
| Canterbury wills | 1609          | 02 Mar 1609     | 08 Jun 1609 | 04 Mar 1609    | 28 May 1609 |
| London parish    | 1609          | 05 Mar 1609     | 04 Jun 1609 | 05 Mar 1609    | 16 Apr 1609 |
| London parish    | 1609.5        | 11 Jun 1609     | 26 Feb 1610 | 11 Jun 1609    | 01 Oct 1609 |
| London bills     | 1609.5        | 15 Jun 1609     | 01 Mar 1610 | 15 Jun 1609    | 28 Sep 1609 |
| Canterbury wills | 1609.5        | 15 Jun 1609     | 01 Mar 1610 | 15 Jun 1609    | 07 Jul 1609 |
| London parish    | 1610          | 05 Mar 1610     | 18 Dec 1610 | 05 Mar 1610    | 20 Aug 1610 |
| London bills     | 1610          | 08 Mar 1610     | 20 Dec 1610 | 08 Mar 1610    | 06 Sep 1610 |
| Canterbury wills | 1610          | 08 Mar 1610     | 20 Dec 1610 | 08 Mar 1610    | 29 Jun 1610 |
| London bills     | 1630          | 24 Dec 1629     | 16 Dec 1630 | 01 Apr 1630    | 05 Aug 1630 |
| Canterbury wills | 1630          | 24 Dec 1629     | 16 Dec 1630 | 28 Dec 1629    | 03 Dec 1630 |
| London parish    | 1630          | 25 Dec 1629     | 18 Dec 1630 | 25 Dec 1629    | 06 Aug 1630 |
| London bills     | 1636          | 24 Dec 1635     | 14 Dec 1637 | 05 May 1636    | 07 Oct 1636 |
| Canterbury wills | 1636          | 24 Dec 1635     | 14 Dec 1637 | 24 Dec 1635    | 29 May 1636 |
| London parish    | 1636          | 25 Dec 1635     | 11 Dec 1637 | 25 Dec 1635    | 15 Oct 1636 |
| London parish    | 1639          | 18 Dec 1639     | 05 Mar 1641 | 18 Dec 1639    | 10 Sep 1640 |
| London bills     | 1639          | 19 Dec 1639     | 04 Mar 1641 | 23 Apr 1640    | 18 Sep 1640 |
| Canterbury wills | 1639          | 19 Dec 1639     | 04 Mar 1641 | 19 Dec 1639    | 03 Dec 1640 |
| London bills     | 1641          | 11 Mar 1641     | 10 Mar 1642 | 15 Apr 1641    | 30 Sep 1641 |
| Canterbury wills | 1641          | 11 Mar 1641     | 10 Mar 1642 | 11 Mar 1641    | 17 Feb 1642 |
| London parish    | 1641          | 12 Mar 1641     | 12 Mar 1642 | 12 Mar 1641    | 24 Sep 1641 |
| London bills     | 1642          | 17 Mar 1642     | 09 Feb 1643 | 17 Mar 1642    | 06 Oct 1642 |
| Canterbury wills | 1642          | 17 Mar 1642     | 09 Feb 1643 | 17 Mar 1642    | 22 May 1642 |
| London parish    | 1642          | 19 Mar 1642     | 12 Feb 1643 | 19 Mar 1642    | 01 Oct 1642 |
| London bills     | 1643          | 16 Feb 1643     | 01 Mar 1644 | 16 Feb 1643    | 12 Oct 1643 |
| London parish    | 1643          | 19 Feb 1643     | 04 Mar 1644 | 19 Feb 1643    | 05 Nov 1643 |
| London parish    | 1644          | 04 Mar 1644     | 19 Mar 1645 | 04 Mar 1644    | 13 Aug 1644 |
| London bills     | 1644          | 07 Mar 1644     | 20 Mar 1645 | 07 Mar 1644    | 11 Oct 1644 |
| London parish    | 1645          | 26 Mar 1645     | 29 Jan 1646 | 26 Mar 1645    | 20 Aug 1645 |
| London bills     | 1645          | 27 Mar 1645     | 29 Jan 1646 | 05 Jun 1645    | 11 Sep 1645 |
| London bills     | 1646          | 05 Feb 1646     | 18 May 1647 | 09 Apr 1646    | 10 Sep 1646 |
| London parish    | 1646          | 05 Feb 1646     | 21 May 1647 | 05 Feb 1646    | 03 Sep 1646 |
| London parish    | 1647          | 21 May 1647     | 11 Dec 1647 | 21 May 1647    | 15 Oct 1647 |
| London bills     | 1647          | 25 May 1647     | 14 Dec 1647 | 25 May 1647    | 14 Sep 1647 |

## References

1. Cohn Jr. SK (2003) *The Black Death Transformed: Disease and Culture in Early Renaissance Europe*. (Arnold, London, United Kingdom). 156
2. Sharpe RR (1889) *Calendar of Wills Proved and Enrolled in the Court of Husting, London, A.D. 1258 – A.D. 1688. Preserved Among the Archives of Corporation of the City of London, at the Guildhall. Edited, with Introduction, by Reginald R. Sharpe ... Printed by Order of the Corporation of the City of London Under the Direction of the Library Committee*. (J. C. Francis). 157
3. Creighton C (1965) *A history of epidemics in Britain*. (Frank Cass & Co. Ltd., London and Edinburgh) Vol. 1, 2nd edition. 158
4. Bushby A (2019) *Demographic patterns in Medieval London inferred from wills probated in the Court of Husting, 1259–1689*. (MSc thesis, McMaster University, Canada). 159
5. Bell J (1665) *London's Remembrancer*. (Company of Parish Clerks). 160
6. Cummins N, Kelly M, Ó Gráda C (2016) Living standards and plague in London, 1560–1665. *The Economic History Review* 69(1):3–34. 161
7. Gani R, Leach S (2004) Epidemiologic determinants for modeling pneumonic plague outbreaks. *Emerging Infectious Diseases* 10(4):608–614. 162
8. Wallinga J, Lipsitch M (2007) How generation intervals shape the relationship between growth rates and reproductive numbers. *Proceedings of the Royal Society of London, Series B* 274:599–604. 163
9. Keeling MJ, Gilligan CA (2000) Metapopulation dynamics of bubonic plague. *Nature* 407:903–906. 164
10. Laperrière V, Badariotti D, Banos A, Müller JP (2009) Structural validation of an individual-based model for plague epidemics simulation. *Ecological Complexity* 6(2):102–112. 165
11. Audouin-Rouzeau F (2003) *Les chemins de la peste: Le rat, la puce et l'homme*. (Presses Universitaires de Rennes). 166
12. Keeling MJ, Gilligan CA (2000) Bubonic plague: a metapopulation model of a zoonosis. *Proceedings of the Royal Society of London B* 267(1458):2219–2230. 167
13. Tollenaere C, et al. (2010) Susceptibility to *Yersinia pestis* experimental infection in wild *Rattus rattus*, reservoir of plague in Madagascar. *EcoHealth* 7(2):242–247. 168
14. Pollitzer R (1952) Plague Studies: 7. Insect Vectors. *Bulletin of the World Health Organization* 7:231–242. 169
15. Ma J, Dushoff J, Bolker BM, Earn DJD (2014) Estimating initial epidemic growth rates. *Bulletin of Mathematical Biology* 76(1):245–260. 170
16. Smirnova A, Chowell G (2017) A primer on stable parameter estimation and forecasting in epidemiology by a problem-oriented regularized least squares algorithm. *Infectious Disease Modelling* 2(2):268–275. 171
17. Finlay R (1981) *Population and metropolis: the demography of London, 1580-1650*, Cambridge Geographical Studies. (Cambridge University Press, Cambridge) Vol. 12. 172
18. Finlay R, Shearer B (1986) Population growth and suburban expansion in *London 1500-1700: The Making of the Metropolis*, eds. Finlay R, Beier A. (Longman Group Limited), pp. 37–59. 173
19. Krylova O (2011) *Predicting epidemiological transitions in infectious disease dynamics: Smallpox in historic London (1664-1930)*. (PhD thesis, McMaster University, Canada). 174
